# Supplementary material for: RRHGE: A Novel Approach to Classify the Estrogen Receptor Based Breast Cancer Subtypes
Source: Hindawi journal article supplement (doi:10.1155/2014/362141), 2014-01-01

## Supplementary Material

**Table S1 - *RRHGE* gene signature consists of 471 genes, i.e., 326 genes for ER+ subtype and 145 genes for ER- subtype.**

| ER+ gene signature |                |                                                                                         |
|--------------------|----------------|-----------------------------------------------------------------------------------------|
| Gene               | ENTREZ GENE ID | Gene Title                                                                              |
| ABCB8              | 11194          | ATP-binding cassette, sub-family B (MDR/TAP), member 8                                  |
| ACIN1              | 22985          | apoptotic chromatin condensation inducer 1                                              |
| ADRB2              | 154            | adrenergic, beta-2-, receptor, surface                                                  |
| AES                | 166            | amino-terminal enhancer of split                                                        |
| AGR2               | 10551          | anterior gradient homolog 2 ( <i>Xenopus laevis</i> )                                   |
| ANP32A             | 8125           | acidic (leucine-rich) nuclear phosphoprotein 32 family, member A                        |
| AP1M2              | 10053          | adaptor-related protein complex 1, mu 2 subunit                                         |
| APEH               | 327            | N-acylaminoacyl-peptide hydrolase                                                       |
| APPL1              | 26060          | adaptor protein, phosphotyrosine interaction, PH domain and leucine zipper containing 1 |
| APPL2              | 55198          | adaptor protein, phosphotyrosine interaction, PH domain and leucine zipper containing 2 |
| AR                 | 367            | androgen receptor                                                                       |
| ARAF               | 369            | v-raf murine sarcoma 3611 viral oncogene homolog                                        |
| ARHGEF15           | 22899          | Rho guanine nucleotide exchange factor (GEF) 15                                         |
| ARL15              | 54622          | ADP-ribosylation factor-like 15                                                         |
| ARL2               | 402            | ADP-ribosylation factor-like 2                                                          |
| ARL2BP             | 23568          | ADP-ribosylation factor-like 2 binding protein                                          |
| ARL3               | 403            | ADP-ribosylation factor-like 3                                                          |
| ARL4D              | 379            | ADP-ribosylation factor-like 4D                                                         |
| ARMC7              | 79637          | armadillo repeat containing 7                                                           |
| ARR3               | 407            | arrestin 3, retinal (X-arrestin)                                                        |
| ASB13              | 79754          | ankyrin repeat and SOCS box-containing 13                                               |
| ATG12              | 9140           | ATG12 autophagy related 12 homolog ( <i>S. cerevisiae</i> )                             |
| ATG4B              | 23192          | ATG4 autophagy related 4 homolog B ( <i>S. cerevisiae</i> )                             |
| ATN1               | 1822           | atrophin 1                                                                              |
| ATP6V1G1           | 9550           | ATPase, H <sup>+</sup> transporting, lysosomal 13kDa, V1 subunit G1                     |
| AXIN1              | 8312           | axin 1                                                                                  |
| BAD                | 572            | BCL2-associated agonist of cell death                                                   |
| BAIAP2             | 10458          | BAI1-associated protein 2                                                               |
| BAK1               | 578            | BCL2-antagonist/killer 1                                                                |
| BAX                | 581            | BCL2-associated X protein                                                               |
| BBC3               | 27113          | BCL2 binding component 3                                                                |
| BCL2               | 596            | B-cell CLL/lymphoma 2                                                                   |
| BCL2L1             | 598            | BCL2-like 1                                                                             |

|          |       |                                                                               |
|----------|-------|-------------------------------------------------------------------------------|
| BCL2L11  | 10018 | BCL2-like 11 (apoptosis facilitator)                                          |
| BCL2L2   | 599   | BCL2-like 2                                                                   |
| BECN1    | 8678  | beclin 1, autophagy related                                                   |
| BIK      | 638   | BCL2-interacting killer (apoptosis-inducing)                                  |
| BIRC7    | 79444 | baculoviral IAP repeat-containing 7                                           |
| BRAP     | 8315  | BRCA1 associated protein                                                      |
| BRCA1    | 672   | breast cancer 1, early onset                                                  |
| BSG      | 682   | basigin (Ok blood group)                                                      |
| BTRC     | 8945  | beta-transducin repeat containing                                             |
| C1orf35  | 79169 | chromosome 1 open reading frame 35                                            |
| C2orf44  | 80304 | chromosome 2 open reading frame 44                                            |
| CA12     | 771   | carbonic anhydrase XII                                                        |
| CAB39    | 51719 | calcium binding protein 39                                                    |
| CABIN1   | 23523 | calcineurin binding protein 1                                                 |
| CALCOCO2 | 10241 | calcium binding and coiled-coil domain 2                                      |
| CASP7    | 840   | caspase 7, apoptosis-related cysteine peptidase                               |
| CBL      | 867   | Cas-Br-M (murine) ecotropic retroviral transforming sequence                  |
| CCDC106  | 29903 | coiled-coil domain containing 106                                             |
| CCDC33   | 80125 | coiled-coil domain containing 33                                              |
| CCDC85B  | 11007 | coiled-coil domain containing 85B                                             |
| CCND1    | 595   | cyclin D1                                                                     |
| CCNT1    | 904   | cyclin T1                                                                     |
| CCNT2    | 905   | cyclin T2                                                                     |
| CD81     | 975   | CD81 molecule                                                                 |
| CDC42    | 998   | cell division cycle 42 (GTP binding protein, 25kDa)                           |
| CDC42EP2 | 10435 | CDC42 effector protein (Rho GTPase binding) 2                                 |
| CDK2     | 1017  | cyclin-dependent kinase 2                                                     |
| CDK9     | 1025  | cyclin-dependent kinase 9                                                     |
| CELSR1   | 9620  | cadherin, EGF LAG seven-pass G-type receptor 1 (flamingo homolog, Drosophila) |
| CEP63    | 80254 | centrosomal protein 63kDa                                                     |
| CEP76    | 79959 | centrosomal protein 76kDa                                                     |
| CETN3    | 1070  | centrin, EF-hand protein, 3                                                   |
| CHMP4A   | 29082 | chromatin modifying protein 4A                                                |
| CHP      | 11261 | calcium binding protein P22                                                   |
| CLTC     | 1213  | clathrin, heavy chain (Hc)                                                    |
| CNNM3    | 26505 | cyclin M3                                                                     |
| COBRA1   | 25920 | cofactor of BRCA1                                                             |
| COIL     | 8161  | coilin                                                                        |
| COL3A1   | 1281  | collagen, type III, alpha 1                                                   |
| COPS4    | 51138 | COP9 constitutive photomorphogenic homolog subunit 4 (Arabidopsis)            |
| COPS6    | 10980 | COP9 constitutive photomorphogenic homolog subunit 6 (Arabidopsis)            |
| CPSF6    | 11052 | cleavage and polyadenylation specific factor 6, 68kDa                         |
| DAG1     | 1605  | dystroglycan 1 (dystrophin-associated glycoprotein 1)                         |

|            |        |                                                                             |
|------------|--------|-----------------------------------------------------------------------------|
| DAXX       | 1616   | death-domain associated protein                                             |
| DCP1A      | 55802  | DCP1 decapping enzyme homolog A ( <i>S. cerevisiae</i> )                    |
| DHX58      | 79132  | DEXH (Asp-Glu-X-His) box polypeptide 58                                     |
| DIABLO     | 56616  | diablo homolog ( <i>Drosophila</i> )                                        |
| DNALI1     | 7802   | dynein, axonemal, light intermediate chain 1                                |
| DNM1       | 1759   | dynamin 1                                                                   |
| DRG2       | 1819   | developmentally regulated GTP binding protein 2                             |
| DTX2       | 113878 | deltex homolog 2 ( <i>Drosophila</i> )                                      |
| DUSP12     | 11266  | dual specificity phosphatase 12                                             |
| E2F2       | 1870   | E2F transcription factor 2                                                  |
| EDC3       | 80153  | enhancer of mRNA decapping 3 homolog ( <i>S. cerevisiae</i> )               |
| EEF1A1     | 1915   | eukaryotic translation elongation factor 1 alpha 1                          |
| EIF2B1     | 1967   | eukaryotic translation initiation factor 2B, subunit 1 alpha, 26kDa         |
| EIF4EBP3   | 8637   | Eukaryotic Translation Initiation Factor 4E Binding Protein 3               |
| ERBB3      | 2065   | v-erb-b2 erythroblastic leukemia viral oncogene homolog 3 (avian)           |
| FAM134A    | 79137  | family with sequence similarity 134, member A                               |
| FAM46C     | 54855  | family with sequence similarity 46, member C                                |
| FAM82A2    | 55177  | family with sequence similarity 82, member A2                               |
| FAM86C     | 55199  | family with sequence similarity 86, member C                                |
| FAU        | 2197   | Finkel-Biskis-Reilly murine sarcoma virus (FBR-MuSV) ubiquitously expressed |
| FBXO34     | 55030  | F-box protein 34                                                            |
| FBXW2      | 26190  | F-box and WD repeat domain containing 2                                     |
| FKBP6      | 8468   | FK506 binding protein 6, 36kDa                                              |
| FOS        | 2353   | FBJ murine osteosarcoma viral oncogene homolog                              |
| GABARAPL2  | 11345  | GABA(A) receptor-associated protein-like 2                                  |
| GADD45GIP1 | 90480  | growth arrest and DNA-damage-inducible, gamma interacting protein 1         |
| GAPDH      | 2597   | glyceraldehyde-3-phosphate dehydrogenase                                    |
| GEMIN7     | 79760  | gem (nuclear organelle) associated protein 7                                |
| GLRX3      | 10539  | glutaredoxin 3                                                              |
| GLUL       | 2752   | glutamate-ammonia ligase                                                    |
| GNB2       | 2783   | guanine nucleotide binding protein (G protein), beta polypeptide 2          |
| GOLSYN     | 55638  | GOLSYN A Protein                                                            |
| GRK6       | 2870   | G protein-coupled receptor kinase 6                                         |
| GSK3B      | 2932   | glycogen synthase kinase 3 beta                                             |
| HBXIP      | 10542  | hepatitis B virus x interacting protein                                     |
| HDAC3      | 8841   | histone deacetylase 3                                                       |
| HEXIM1     | 10614  | hexamethylene bis-acetamide inducible 1                                     |
| HIF1AN     | 55662  | hypoxia inducible factor 1, alpha subunit inhibitor                         |
| HIP1       | 3092   | huntingtin interacting protein 1                                            |
| HMOX2      | 3163   | heme oxygenase (decycling) 2                                                |
| HNRNPM     | 4670   | heterogeneous nuclear ribonucleoprotein M                                   |
| HSD17B14   | 51171  | hydroxysteroid (17-beta) dehydrogenase 14                                   |
| HSP90AB1   | 3326   | heat shock protein 90kDa alpha (cytosolic), class B member 1                |

|           |       |                                                                                                                  |
|-----------|-------|------------------------------------------------------------------------------------------------------------------|
| HSPB1     | 3315  | heat shock 27kDa protein 1                                                                                       |
| HSPBP1    | 23640 | HSPA (heat shock 70kDa) binding protein, cytoplasmic cochaperone 1                                               |
| HTRA2     | 27429 | HtrA serine peptidase 2                                                                                          |
| HUWE1     | 10075 | HECT, UBA and WWE domain containing 1                                                                            |
| IGF1R     | 3480  | insulin-like growth factor 1 receptor                                                                            |
| IGF2R     | 3482  | insulin-like growth factor 2 receptor                                                                            |
| IK        | 3550  | IK cytokine, down-regulator of HLA II                                                                            |
| IKBKAP    | 8518  | inhibitor of kappa light polypeptide gene enhancer in B-cells, kinase complex-associated protein                 |
| IKBKE     | 9641  | inhibitor of kappa light polypeptide gene enhancer in B-cells, kinase epsilon                                    |
| INO80B    | 83444 | INO80 complex subunit B                                                                                          |
| INVS      | 27130 | inversin                                                                                                         |
| IQGAP1    | 8826  | IQ motif containing GTPase activating protein 1                                                                  |
| IRS1      | 3667  | insulin receptor substrate 1                                                                                     |
| ISYNA1    | 51477 | inositol-3-phosphate synthase 1                                                                                  |
| ITGB3BP   | 23421 | integrin beta 3 binding protein (beta3-endonexin)                                                                |
| KIAA0174  | 9798  | KIAA0174                                                                                                         |
| KIAA1279  | 26128 | KIAA1279                                                                                                         |
| KIDINS220 | 57498 | kinase D-interacting substrate, 220kDa                                                                           |
| KIF15     | 56992 | kinesin family member 15                                                                                         |
| KIF22     | 3835  | kinesin family member 22                                                                                         |
| KLC1      | 3831  | kinesin light chain 1                                                                                            |
| KLC2      | 64837 | kinesin light chain 2                                                                                            |
| KLHL12    | 59349 | kelch-like 12 (Drosophila)                                                                                       |
| KLHL2     | 11275 | kelch-like 2, Mayven (Drosophila)                                                                                |
| LAMC1     | 3915  | laminin, gamma 1 (formerly LAMB2)                                                                                |
| LIG4      | 3981  | ligase IV, DNA, ATP-dependent                                                                                    |
| LIMK1     | 3984  | LIM domain kinase 1                                                                                              |
| LRPAP1    | 4043  | low density lipoprotein receptor-related protein associated protein 1                                            |
| LRPPRC    | 10128 | leucine-rich PPR-motif containing                                                                                |
| Magmas    | 51025 | mitochondria associated protein involved in granulocyte macrophage colony stimulating factor signal transduction |
| MAP2K2    | 5605  | mitogen-activated protein kinase kinase 2                                                                        |
| MAP3K1    | 4214  | mitogen-activated protein kinase kinase kinase 1                                                                 |
| MAPK8     | 5599  | mitogen-activated protein kinase 8                                                                               |
| MAPKSP1   | 8649  | MAPK scaffold protein 1                                                                                          |
| MAPT      | 4137  | microtubule-associated protein tau                                                                               |
| MBIP      | 51562 | MAP3K12 binding inhibitory protein 1                                                                             |
| MCL1      | 4170  | myeloid cell leukemia sequence 1 (BCL2-related)                                                                  |
| MDM2      | 4193  | Mdm2 p53 binding protein homolog (mouse)                                                                         |
| MDM4      | 4194  | Mdm4 p53 binding protein homolog (mouse)                                                                         |
| MEA1      | 4201  | male-enhanced antigen 1                                                                                          |
| MED22     | 6837  | mediator complex subunit 22                                                                                      |
| MED27     | 9442  | mediator complex subunit 27                                                                                      |

|          |        |                                                                                                     |
|----------|--------|-----------------------------------------------------------------------------------------------------|
| MED28    | 80306  | mediator complex subunit 28                                                                         |
| MED31    | 51003  | mediator complex subunit 31                                                                         |
| MOAP1    | 64112  | modulator of apoptosis 1                                                                            |
| MOBKL3   | 25843  | MOB1, Mps One Binder kinase activator-like 3 (yeast)                                                |
| MORF4L1  | 10933  | mortality factor 4 like 1                                                                           |
| MRE11A   | 4361   | MRE11 meiotic recombination 11 homolog A ( <i>S. cerevisiae</i> )                                   |
| MRFAP1L1 | 114932 | Morf4 family associated protein 1-like 1                                                            |
| MRPL44   | 65080  | mitochondrial ribosomal protein L44                                                                 |
| MSN      | 4478   | moesin                                                                                              |
| MUC1     | 4582   | mucin 1, cell surface associated                                                                    |
| MYCBP    | 26292  | c-myc binding protein                                                                               |
| MYL6     | 4637   | myosin, light chain 6, alkali, smooth muscle and non-muscle                                         |
| NBN      | 4683   | nibrin                                                                                              |
| NCOA1    | 8648   | nuclear receptor coactivator 1                                                                      |
| NCOA2    | 10499  | nuclear receptor coactivator 2                                                                      |
| NCOA4    | 8031   | nuclear receptor coactivator 4                                                                      |
| NCOR1    | 9611   | nuclear receptor corepressor 1                                                                      |
| NDC80    | 10403  | NDC80 homolog, kinetochore complex component ( <i>S. cerevisiae</i> )                               |
| NDEL1    | 81565  | nudE nuclear distribution gene E homolog ( <i>A. nidulans</i> )-like 1                              |
| NDUFB8   | 4714   | NADH dehydrogenase (ubiquinone) 1 beta subcomplex, 8, 19kDa                                         |
| NDUFV2   | 4729   | NADH dehydrogenase (ubiquinone) flavoprotein 2, 24kDa                                               |
| NEDD4    | 4734   | neural precursor cell expressed, developmentally down-regulated 4                                   |
| NFKBIA   | 4792   | nuclear factor of kappa light polypeptide gene enhancer in B-cells inhibitor, alpha                 |
| NHEJ1    | 79840  | nonhomologous end-joining factor 1                                                                  |
| NME3     | 4832   | non-metastatic cells 3, protein expressed in                                                        |
| NOC4L    | 79050  | nucleolar complex associated 4 homolog ( <i>S. cerevisiae</i> )                                     |
| NPDC1    | 56654  | neural proliferation, differentiation and control, 1                                                |
| NUDT18   | 79873  | nudix (nucleoside diphosphate linked moiety X)-type motif 18                                        |
| NUDT21   | 11051  | nudix (nucleoside diphosphate linked moiety X)-type motif 21                                        |
| NUP54    | 53371  | nucleoporin 54kDa                                                                                   |
| OGFOD2   | 79676  | 2-oxoglutarate and iron-dependent oxygenase domain containing 2                                     |
| ORC2L    | 4999   | origin recognition complex, subunit 2                                                               |
| ORC4L    | 5000   | origin recognition complex, subunit 4                                                               |
| ORC5L    | 5001   | origin recognition complex, subunit 5                                                               |
| P2RY1    | 5028   | purinergic receptor P2Y, G-protein coupled, 1                                                       |
| PAFAH1B2 | 5049   | platelet-activating factor acetylhydrolase 1b, catalytic subunit 2 (30kDa)                          |
| PAK2     | 5062   | p21 protein (Cdc42/Rac)-activated kinase 2                                                          |
| PARP1    | 142    | poly (ADP-ribose) polymerase 1                                                                      |
| PCBD1    | 5092   | pterin-4 alpha-carbinolamine dehydratase/dimerization cofactor of hepatocyte nuclear factor 1 alpha |
| PDE6D    | 5147   | phosphodiesterase 6D, cGMP-specific, rod, delta                                                     |
| PDLIM7   | 9260   | PDZ and LIM domain 7 (enigma)                                                                       |
| PEX11B   | 8799   | peroxisomal biogenesis factor 11 beta                                                               |
| PEX12    | 5193   | peroxisomal biogenesis factor 12                                                                    |

|           |       |                                                                                            |
|-----------|-------|--------------------------------------------------------------------------------------------|
| PEX19     | 5824  | peroxisomal biogenesis factor 19                                                           |
| PEX5      | 5830  | peroxisomal biogenesis factor 5                                                            |
| PHF10     | 55274 | PHD finger protein 10                                                                      |
| PIH1D1    | 55011 | PIH1 domain containing 1                                                                   |
| PIK3R1    | 5295  | phosphoinositide-3-kinase, regulatory subunit 1 (alpha)                                    |
| PIK3R4    | 30849 | phosphoinositide-3-kinase, regulatory subunit 4                                            |
| PJA2      | 9867  | praja ring finger 2                                                                        |
| PLA2G15   | 23659 | phospholipase A2, group XV                                                                 |
| PLEKHF2   | 79666 | pleckstrin homology domain containing, family F (with FYVE domain) member 2                |
| PLXNB1    | 5364  | plexin B1                                                                                  |
| POLI      | 11201 | polymerase (DNA directed) iota                                                             |
| POU2F1    | 5451  | POU class 2 homeobox 1                                                                     |
| PPP2CA    | 5515  | protein phosphatase 2, catalytic subunit, alpha isozyme                                    |
| PPP2R1A   | 5518  | protein phosphatase 2, regulatory subunit A, alpha                                         |
| PPP2R1B   | 5519  | protein phosphatase 2, regulatory subunit A, beta                                          |
| PQBP1     | 10084 | polyglutamine binding protein 1                                                            |
| PRKAR1A   | 5573  | protein kinase, cAMP-dependent, regulatory, type I, alpha (tissue specific extinguisher 1) |
| PRKRA     | 8575  | protein kinase, interferon-inducible double stranded RNA dependent activator               |
| PRPF4     | 9128  | PRP4 pre-mRNA processing factor 4 homolog (yeast)                                          |
| PRR13     | 54458 | proline rich 13                                                                            |
| PSAP      | 5660  | prosaposin                                                                                 |
| PTBP2     | 58155 | polypyrimidine tract binding protein 2                                                     |
| PTPRK     | 5796  | protein tyrosine phosphatase, receptor type, K                                             |
| PXMP3     | 5828  | Peroxisomal Membrane Protein 3 (35kD, Zellweger Syndrome)                                  |
| PXN       | 5829  | paxillin                                                                                   |
| PYCARD    | 29108 | PYD and CARD domain containing                                                             |
| QARS      | 5859  | glutamyl-tRNA synthetase                                                                   |
| RAB11A    | 8766  | RAB11A, member RAS oncogene family                                                         |
| RAB11FIP2 | 22841 | RAB11 family interacting protein 2 (class I)                                               |
| RAB17     | 64284 | RAB17, member RAS oncogene family                                                          |
| RAB2A     | 5862  | RAB2A, member RAS oncogene family                                                          |
| RAB3IL1   | 5866  | RAB3A interacting protein (rabin3)-like 1                                                  |
| RABGGTB   | 5876  | Rab geranylgeranyltransferase, beta subunit                                                |
| RAD50     | 10111 | RAD50 homolog (S. cerevisiae)                                                              |
| RAD51     | 5888  | RAD51 homolog (RecA homolog, E. coli) (S. cerevisiae)                                      |
| RALGPS2   | 55103 | Ral GEF with PH domain and SH3 binding motif 2                                             |
| RANBP2    | 5903  | RAN binding protein 2                                                                      |
| RANGAP1   | 5905  | Ran GTPase activating protein 1                                                            |
| RARA      | 5914  | retinoic acid receptor, alpha                                                              |
| RASSF1    | 11186 | Ras association (RalGDS/AF-6) domain family member 1                                       |
| RBM4B     | 83759 | RNA binding motif protein 4B                                                               |
| RBPM5     | 11030 | RNA binding protein with multiple splicing                                                 |

|          |       |                                                                                                   |
|----------|-------|---------------------------------------------------------------------------------------------------|
| RCBTB2   | 1102  | regulator of chromosome condensation (RCC1) and BTB (POZ) domain containing protein 2             |
| RDBP     | 7936  | RD RNA binding protein                                                                            |
| RGS1     | 5996  | regulator of G-protein signaling 1                                                                |
| RNASE6   | 6039  | ribonuclease, RNase A family, k6                                                                  |
| RND1     | 27289 | Rho family GTPase 1                                                                               |
| RNF14    | 9604  | ring finger protein 14                                                                            |
| ROBLD3   | 28956 | roadblock domain containing 3                                                                     |
| ROGDI    | 79641 | rogdi homolog (Drosophila)                                                                        |
| RPL11    | 6135  | ribosomal protein L11                                                                             |
| RPS6KC1  | 26750 | ribosomal protein S6 kinase, 52kDa, polypeptide 1                                                 |
| RWDD2B   | 10069 | RWD domain containing 2B                                                                          |
| RXRA     | 6256  | retinoid X receptor, alpha                                                                        |
| S100A10  | 6281  | S100 calcium binding protein A10                                                                  |
| SAFB     | 6294  | scaffold attachment factor B                                                                      |
| SCAND1   | 51282 | SCAN domain containing 1                                                                          |
| SELENBP1 | 8991  | selenium binding protein 1                                                                        |
| SERPINA5 | 5104  | serpin peptidase inhibitor, clade A (alpha-1 antiproteinase, antitrypsin), member 5               |
| SETDB1   | 9869  | SET domain, bifurcated 1                                                                          |
| SFRS1    | 6426  | serine/arginine-rich splicing factor 1                                                            |
| SIRT6    | 51548 | sirtuin 6                                                                                         |
| SLC9A3R1 | 9368  | solute carrier family 9 (sodium/hydrogen exchanger), member 3 regulator 1                         |
| SMAD5    | 4090  | SMAD family member 5                                                                              |
| SMARCD1  | 6602  | SWI/SNF related, matrix associated, actin dependent regulator of chromatin, subfamily d, member 1 |
| SMC3     | 9126  | structural maintenance of chromosomes 3                                                           |
| SMN1     | 6606  | survival of motor neuron 1, telomeric                                                             |
| SNRPB    | 6628  | small nuclear ribonucleoprotein polypeptides B and B1                                             |
| SOS2     | 6655  | son of sevenless homolog 2 (Drosophila)                                                           |
| SP1      | 6667  | Sp1 transcription factor                                                                          |
| SP110    | 3431  | SP110 nuclear body protein                                                                        |
| SPARC    | 6678  | secreted protein, acidic, cysteine-rich (osteonectin)                                             |
| SRRM2    | 23524 | serine/arginine repetitive matrix 2                                                               |
| STAG2    | 10735 | stromal antigen 2                                                                                 |
| STK11    | 6794  | serine/threonine kinase 11                                                                        |
| STK19    | 8859  | serine/threonine kinase 19                                                                        |
| STMN4    | 81551 | stathmin-like 4                                                                                   |
| SYT17    | 51760 | synaptotagmin XVII                                                                                |
| TAC3     | 6866  | tachykinin 3                                                                                      |
| TADA3L   | 10474 | transcriptional adaptor 3                                                                         |
| TAF1     | 6872  | TAF1 RNA polymerase II, TATA box binding protein (TBP)-associated factor, 250kDa                  |
| TAF1A    | 9015  | TATA box binding protein (TBP)-associated factor, RNA polymerase I, A, 48kDa                      |
| TBC1D17  | 79735 | TBC1 domain family, member 17                                                                     |

|                           |        |                                                                            |
|---------------------------|--------|----------------------------------------------------------------------------|
| TCEB1                     | 6921   | transcription elongation factor B (SIII), polypeptide 1 (15kDa, elongin C) |
| TCEB2                     | 6923   | transcription elongation factor B (SIII), polypeptide 2 (18kDa, elongin B) |
| TERF1                     | 7013   | telomeric repeat binding factor (NIMA-interacting) 1                       |
| TFG                       | 10342  | TRK-fused gene                                                             |
| TGFB1I1                   | 7041   | transforming growth factor beta 1 induced transcript 1                     |
| TGIF1                     | 7050   | TGFB-induced factor homeobox 1                                             |
| THAP1                     | 55145  | THAP domain containing, apoptosis associated protein 1                     |
| TIMM44                    | 10469  | translocase of inner mitochondrial membrane 44 homolog (yeast)             |
| TINF2                     | 26277  | TERF1 (TRF1)-interacting nuclear factor 2                                  |
| TOE1                      | 114034 | target of EGR1, member 1 (nuclear)                                         |
| TOLLIP                    | 54472  | toll interacting protein                                                   |
| TRIM23                    | 373    | tripartite motif-containing 23                                             |
| TSC1                      | 7248   | tuberous sclerosis 1                                                       |
| TSC22D1                   | 8848   | TSC22 domain family, member 1                                              |
| U2AF2                     | 11338  | U2 small nuclear RNA auxiliary factor 2                                    |
| UBA5                      | 79876  | ubiquitin-like modifier activating enzyme 5                                |
| UBE2B                     | 7320   | ubiquitin-conjugating enzyme E2B (RAD6 homolog)                            |
| ULK2                      | 9706   | unc-51-like kinase 2 (C. elegans)                                          |
| UNC119                    | 9094   | unc-119 homolog (C. elegans)                                               |
| VAMP4                     | 8674   | vesicle-associated membrane protein 4                                      |
| VAV3                      | 10451  | vav 3 guanine nucleotide exchange factor                                   |
| VDR                       | 7421   | vitamin D (1,25- dihydroxyvitamin D3) receptor                             |
| WASL                      | 8976   | Wiskott-Aldrich syndrome-like                                              |
| WDYHV1                    | 55093  | WDYHV motif containing 1                                                   |
| WWP1                      | 11059  | WW domain containing E3 ubiquitin protein ligase 1                         |
| XIAP                      | 331    | X-linked inhibitor of apoptosis                                            |
| XPA                       | 7507   | xeroderma pigmentosum, complementation group A                             |
| XRCC4                     | 7518   | X-ray repair complementing defective repair in Chinese hamster cells 4     |
| YY1                       | 7528   | YY1 transcription factor                                                   |
| ZCCHC10                   | 54819  | zinc finger, CCHC domain containing 10                                     |
| ZEB2                      | 9839   | zinc finger E-box binding homeobox 2                                       |
| ZFP36L1                   | 677    | zinc finger protein 36, C3H type-like 1                                    |
| ZFPL1                     | 7542   | zinc finger protein-like 1                                                 |
| ZFYVE9                    | 9372   | zinc finger, FYVE domain containing 9                                      |
| ZMYND10                   | 51364  | zinc finger, MYND-type containing 10                                       |
| ZNF263                    | 10127  | zinc finger protein 263                                                    |
| ZNF408                    | 79797  | zinc finger protein 408                                                    |
| ZNF580                    | 51157  | zinc finger protein 580                                                    |
| ZNF764                    | 92595  | zinc finger protein 764                                                    |
| <b>ER- gene signature</b> |        |                                                                            |
| ACTN4                     | 81     | actinin, alpha 4                                                           |
| ALDH2                     | 217    | aldehyde dehydrogenase 2 family (mitochondrial)                            |



|          |       |                                                                                          |
|----------|-------|------------------------------------------------------------------------------------------|
| ANXA3    | 306   | annexin A3                                                                               |
| AOF2     | 23028 | amine oxidase (flavin containing) domain 2                                               |
| APBA1    | 320   | amyloid beta (A4) precursor protein-binding, family A, member 1                          |
| APIP     | 51074 | APAF1 interacting protein                                                                |
| APP      | 351   | amyloid beta (A4) precursor protein                                                      |
| ATP5C1   | 509   | ATP synthase, H <sup>+</sup> transporting, mitochondrial F1 complex, gamma polypeptide 1 |
| BCR      | 613   | breakpoint cluster region                                                                |
| C10orf10 | 11067 | chromosome 10 open reading frame 10                                                      |
| C10orf88 | 80007 | chromosome 10 open reading frame 88                                                      |
| CBLB     | 868   | Cas-Br-M (murine) ecotropic retroviral transforming sequence b                           |
| CBX5     | 23468 | chromobox homolog 5                                                                      |
| CCND3    | 896   | cyclin D3                                                                                |
| CCT5     | 22948 | chaperonin containing TCP1, subunit 5 (epsilon)                                          |
| CD1B     | 910   | CD1b molecule                                                                            |
| CDC25B   | 994   | cell division cycle 25 homolog B (S. pombe)                                              |
| CKAP4    | 10970 | cytoskeleton-associated protein 4                                                        |
| COPB2    | 9276  | coatamer protein complex, subunit beta 2 (beta prime)                                    |
| CSNK2A1  | 1457  | casein kinase 2, alpha 1 polypeptide                                                     |
| CSNK2A2  | 1459  | casein kinase 2, alpha prime polypeptide                                                 |
| CSNK2B   | 1460  | casein kinase 2, beta polypeptide                                                        |
| CTSB     | 1508  | cathepsin B                                                                              |
| CUTC     | 51076 | cutC copper transporter homolog (E. coli)                                                |
| CXCL13   | 10563 | chemokine (C-X-C motif) ligand 13                                                        |
| DDX1     | 1653  | DEAD (Asp-Glu-Ala-Asp) box polypeptide 1                                                 |
| DFFA     | 1676  | DNA fragmentation factor, 45kDa, alpha polypeptide                                       |
| DFFB     | 1677  | DNA fragmentation factor, 40kDa, beta polypeptide (caspase-activated DNase)              |
| DIAPH1   | 1729  | diaphanous homolog 1 (Drosophila)                                                        |
| DKC1     | 1736  | dyskeratosis congenita 1, dyskerin                                                       |
| DOCK2    | 1794  | dedicator of cytokinesis 2                                                               |
| DVL2     | 1856  | dishevelled, dsh homolog 2 (Drosophila)                                                  |
| EEF1B2   | 1933  | eukaryotic translation elongation factor 1 beta 2                                        |
| EGLN1    | 54583 | egl nine homolog 1 (C. elegans)                                                          |
| EIF2AK2  | 5610  | eukaryotic translation initiation factor 2-alpha kinase 2                                |
| EIF2S1   | 1965  | eukaryotic translation initiation factor 2, subunit 1 alpha, 35kDa                       |
| EIF3A    | 8661  | eukaryotic translation initiation factor 3, subunit A                                    |
| EIF3B    | 8662  | eukaryotic translation initiation factor 3, subunit B                                    |
| EIF4A1   | 1973  | eukaryotic translation initiation factor 4A1                                             |
| EIF4A2   | 1974  | eukaryotic translation initiation factor 4A2                                             |
| EIF4G2   | 1982  | eukaryotic translation initiation factor 4 gamma, 2                                      |
| FAS      | 355   | Fas (TNF receptor superfamily, member 6)                                                 |
| FHL2     | 2274  | four and a half LIM domains 2                                                            |
| FXR1     | 8087  | fragile X mental retardation, autosomal homolog 1                                        |
| FYB      | 2533  | FYN binding protein                                                                      |

|          |       |                                                                                   |
|----------|-------|-----------------------------------------------------------------------------------|
| GADD45A  | 1647  | growth arrest and DNA-damage-inducible, alpha                                     |
| GCC1     | 79571 | GRIP and coiled-coil domain containing 1                                          |
| GOT2     | 2806  | glutamic-oxaloacetic transaminase 2, mitochondrial (aspartate aminotransferase 2) |
| GPNMB    | 10457 | glycoprotein (transmembrane) nmb                                                  |
| GRAP2    | 9402  | GRB2-related adaptor protein 2                                                    |
| GREM1    | 26585 | gremlin 1                                                                         |
| GTF2H1   | 2965  | general transcription factor IIH, polypeptide 1, 62kDa                            |
| HLA-A    | 3105  | major histocompatibility complex, class I, A                                      |
| HMG20A   | 10363 | high-mobility group 20A                                                           |
| HNRNPUL1 | 11100 | heterogeneous nuclear ribonucleoprotein U-like 1                                  |
| HPCAL1   | 3241  | hippocalcin-like 1                                                                |
| KARS     | 3735  | lysyl-tRNA synthetase                                                             |
| KIAA0408 | 9729  | KIAA0408                                                                          |
| KIAA1128 | 54462 | coiled-coil serine-rich protein 2                                                 |
| KIT      | 3815  | v-kit Hardy-Zuckerman 4 feline sarcoma viral oncogene homolog                     |
| KPNA3    | 3839  | karyopherin alpha 3 (importin alpha 4)                                            |
| LAPTM5   | 7805  | lysosomal protein transmembrane 5                                                 |
| LCK      | 3932  | lymphocyte-specific protein tyrosine kinase                                       |
| LCP2     | 3937  | lymphocyte cytosolic protein 2 (SH2 domain containing leukocyte protein of 76kDa) |
| LMNA     | 4000  | lamin A/C                                                                         |
| LMNB1    | 4001  | lamin B1                                                                          |
| LSM6     | 11157 | LSM6 homolog, U6 small nuclear RNA associated ( <i>S. cerevisiae</i> )            |
| LSM7     | 51690 | LSM7 homolog, U6 small nuclear RNA associated ( <i>S. cerevisiae</i> )            |
| LTBP3    | 4054  | latent transforming growth factor beta binding protein 3                          |
| LUM      | 4060  | lumican                                                                           |
| MAD1L1   | 8379  | MAD1 mitotic arrest deficient-like 1 (yeast)                                      |
| MAGOH    | 4116  | mago-nashi homolog, proliferation-associated ( <i>Drosophila</i> )                |
| MAP3K5   | 4217  | mitogen-activated protein kinase kinase kinase 5                                  |
| MARK2    | 2011  | MAP/microtubule affinity-regulating kinase 2                                      |
| MBD1     | 4152  | methyl-CpG binding domain protein 1                                               |
| MBD4     | 8930  | methyl-CpG binding domain protein 4                                               |
| MCM7     | 4176  | minichromosome maintenance complex component 7                                    |
| MCOLN1   | 57192 | mucolipin 1                                                                       |
| MPZL1    | 9019  | myelin protein zero-like 1                                                        |
| MVD      | 4597  | mevalonate (diphospho) decarboxylase                                              |
| NAE1     | 8883  | NEDD8 activating enzyme E1 subunit 1                                              |
| NCF2     | 4688  | neutrophil cytosolic factor 2                                                     |
| NCK2     | 8440  | NCK adaptor protein 2                                                             |
| NFYB     | 4801  | nuclear transcription factor Y, beta                                              |
| NFYC     | 4802  | nuclear transcription factor Y, gamma                                             |
| PABPC1   | 26986 | poly(A) binding protein, cytoplasmic 1                                            |
| PAFAH1B1 | 5048  | platelet-activating factor acetylhydrolase 1b, regulatory subunit 1 (45kDa)       |
| PAIP1    | 10605 | poly(A) binding protein interacting protein 1                                     |

|          |       |                                                                        |
|----------|-------|------------------------------------------------------------------------|
| PJA1     | 64219 | praja ring finger 1                                                    |
| PLS3     | 5358  | plastin 3                                                              |
| PLSCR3   | 57048 | phospholipid scramblase 3                                              |
| PRNP     | 5621  | prion protein                                                          |
| PRPF40A  | 55660 | PRP40 pre-mRNA processing factor 40 homolog A ( <i>S. cerevisiae</i> ) |
| PSMD11   | 5717  | proteasome (prosome, macropain) 26S subunit, non-ATPase, 11            |
| PTCD3    | 55037 | Pentatricopeptide repeat domain 3                                      |
| RBM7     | 10179 | RNA binding motif protein 7                                            |
| RBM8A    | 9939  | RNA binding motif protein 8A                                           |
| RCN2     | 5955  | reticulocalbin 2, EF-hand calcium binding domain                       |
| RCOR1    | 23186 | REST corepressor 1                                                     |
| RELB     | 5971  | v-rel reticuloendotheliosis viral oncogene homolog B                   |
| RGS2     | 5997  | regulator of G-protein signaling 2, 24kDa                              |
| RNF111   | 54778 | ring finger protein 111                                                |
| RNF13    | 11342 | ring finger protein 13                                                 |
| RNF146   | 81847 | ring finger protein 146                                                |
| RPA3     | 6119  | replication protein A3, 14kDa                                          |
| RPL5     | 6125  | ribosomal protein L5                                                   |
| RPS15    | 6209  | ribosomal protein S15                                                  |
| RUNX3    | 864   | runt-related transcription factor 3                                    |
| S100A4   | 6275  | S100 calcium binding protein A4                                        |
| SAE1     | 10055 | SUMO1 activating enzyme subunit 1                                      |
| SERPINB9 | 5272  | serpin peptidase inhibitor, clade B (ovalbumin), member 9              |
| SMAD1    | 4086  | SMAD family member 1                                                   |
| SMURF1   | 57154 | SMAD specific E3 ubiquitin protein ligase 1                            |
| SMURF2   | 64750 | SMAD specific E3 ubiquitin protein ligase 2                            |
| SNIP1    | 79753 | Smad nuclear interacting protein 1                                     |
| SNRPE    | 6635  | small nuclear ribonucleoprotein polypeptide E                          |
| SORBS2   | 8470  | sorbin and SH3 domain containing 2                                     |
| SOS1     | 6654  | son of sevenless homolog 1 ( <i>Drosophila</i> )                       |
| SRGN     | 5552  | serglycin                                                              |
| SSR1     | 6745  | signal sequence receptor, alpha                                        |
| SUMO2    | 6613  | SMT3 suppressor of mif two 3 homolog 2 ( <i>S. cerevisiae</i> )        |
| SVIL     | 6840  | supervillin                                                            |
| TBK1     | 29110 | TANK-binding kinase 1                                                  |
| TNFAIP3  | 7128  | tumor necrosis factor, alpha-induced protein 3                         |
| TNFAIP8  | 25816 | tumor necrosis factor, alpha-induced protein 8                         |
| TNFRSF1B | 7133  | tumor necrosis factor receptor superfamily, member 1B                  |
| TNIP1    | 10318 | TNFAIP3 interacting protein 1                                          |
| TRAF3    | 7187  | TNF receptor-associated factor 3                                       |
| TRIM27   | 5987  | tripartite motif-containing 27                                         |
| TRIM29   | 23650 | tripartite motif-containing 29                                         |
| TSPAN6   | 7105  | tetraspanin 6                                                          |
| TTC19    | 54902 | tetratricopeptide repeat domain 19                                     |

|        |       |                                                           |
|--------|-------|-----------------------------------------------------------|
| TXN    | 7295  | thioredoxin                                               |
| TYK2   | 7297  | tyrosine kinase 2                                         |
| UBA2   | 10054 | ubiquitin-like modifier activating enzyme 2               |
| UBE2J1 | 51465 | ubiquitin-conjugating enzyme E2, J1 (UBC6 homolog, yeast) |
| UBQLN2 | 29978 | ubiquilin 2                                               |
| UPF1   | 5976  | UPF1 regulator of nonsense transcripts homolog (yeast)    |
| UPF2   | 26019 | UPF2 regulator of nonsense transcripts homolog (yeast)    |
| UPF3B  | 65109 | UPF3 regulator of nonsense transcripts homolog B (yeast)  |
| WAS    | 7454  | Wiskott-Aldrich syndrome (eczema-thrombocytopenia)        |
| WIPF1  | 7456  | WAS/WASL interacting protein family, member 1             |
| XPO1   | 7514  | exportin 1 (CRM1 homolog, yeast)                          |
| YAP1   | 10413 | Yes-associated protein 1                                  |
| YIPF3  | 25844 | Yip1 domain family, member 3                              |

**Table S2 - Enriched GO Terms for genes in the *RRHGE* gene signature.**

| GO         | GO Description                                                   | Genes                                                                                                                                                                                                    | P-Value |
|------------|------------------------------------------------------------------|----------------------------------------------------------------------------------------------------------------------------------------------------------------------------------------------------------|---------|
| GO:0010941 | regulation of apoptosis                                          | RTN4, XRCC4, XIAP, NFKBIA, MLH1, TNFSF13, BCL2L1, BAK1, IGF1R, CASP3, PPP2CA, PRKRA, DIABLO, STAMBP, PPP2R1A, VAV3, LIG4, BAD, YWHAE, BRCA1, TAX1BP1, DDIT3, CDKN1A, NME3, HDAC1, BAX, RIPK1, BIK, MAPK8 | 681E-11 |
| GO:0010941 | regulation of cell death                                         | RTN4, XRCC4, XIAP, NFKBIA, MLH1, TNFSF13, BCL2L1, BAK1, IGF1R, CASP3, PPP2CA, PRKRA, DIABLO, STAMBP, PPP2R1A, VAV3, LIG4, BAD, YWHAE, BRCA1, TAX1BP1, DDIT3, CDKN1A, NME3, HDAC1, BAX, RIPK1, BIK, MAPK8 | 916E-11 |
| GO:0006917 | induction of apoptosis                                           | PPP2R1A, VAV3, MLH1, TNFSF13, BAD, YWHAE, BRCA1, BAK1, CDKN1A, CASP3, NME3, PPP2CA, BAX, RIPK1, PRKRA, DIABLO, BIK, MAPK8                                                                                | 241E-10 |
| GO:0042127 | regulation of cell proliferation                                 | STAMBP, XRCC4, KAT2B, STK11, IGFBP7, TNFSF13B, NFKBIA, TNFSF13, RB1, BCL2L1, LIG4, IRS1, BRCA1, CDK2, IGF1R, CASP3, CCND1, CDKN1A, HDAC1, BAX, PRKRA, MDM4, LDOC1                                        | 130E-07 |
| GO:0006366 | transcription from RNA polymerase II promoter                    | CCNT2, TAF1, TAF1A, CCNT1, CDK9, TBP, GTF2B, DDIT3, MED4, TAF12, GTF2F1, TCEB2, NFE2L2, PARP1                                                                                                            | 714E-09 |
| GO:0030521 | androgen receptor signaling pathway                              | AR, MED4, NCOA4, RB1, RNF14, BRCA1                                                                                                                                                                       | 290E-07 |
| GO:0043549 | regulation of kinase activity                                    | CCNT2, PPP2R1A, MAPKSP1, VAV3, CCNT1, RB1, MBIP, ROBLD3, IRS1, CDC42, CCND1, CDKN1A, CASP3, HEXIM1, PPP2CA, RIPK1, GADD45G                                                                               | 644E-09 |
| GO:0032868 | response to insulin stimulus                                     | IGF1R, AR, KAT2B, FBP1, APPL1, PARP1, IRS1                                                                                                                                                               | 528E-06 |
| GO:0045597 | positive regulation of cell differentiation                      | XRCC4, MAPT, FOXA1, RB1, LIG4, BAD                                                                                                                                                                       | 833E-04 |
| GO:0042770 | DNA damage response, signal transduction                         | CCND1, MLH1, CEP63, BRCA1                                                                                                                                                                                | 475E-04 |
| GO:0000087 | M phase of mitotic cell cycle                                    | MAD1L1, CHFR, CDC25B                                                                                                                                                                                     | 612E-03 |
| GO:0007169 | transmembrane receptor protein tyrosine kinase signaling pathway | NCK2, GRB2, CTGF, NCK1, LCP2                                                                                                                                                                             | 150E-03 |
| GO:0007155 | cell adhesion                                                    | APP, CTGF, RAC1, THBS2, APBA1                                                                                                                                                                            | 890E-03 |
| GO:0000398 | nuclear mRNA splicing, via spliceosome                           | FUS, HNRNPH3, UPF3B, HNRNPUL1, RSRC1, PTBP1, DDX1, SNRPD2, LSM2, HNRNPR                                                                                                                                  | 112E-07 |
| GO:0070647 | protein modification by small protein conjugation or removal     | SUMO2, UBE2M, UBA3, NEDD8, SAE1, SMURF1, CHFR, NAE1                                                                                                                                                      | 672E-06 |
| GO:0015931 | nucleobase, nucleoside, nucleotide and nucleic acid transport    | XPO1, UPF2, UPF1, UPF3B                                                                                                                                                                                  | 854E-04 |
| GO:0009967 | positive regulation of signal transduction                       | MEN1, REL, TBK1, RAC1                                                                                                                                                                                    | 510E-03 |

**Table S3 - Enriched pathways associated with genes in the *RRHGE* gene signature.**

| Pathway Class                                                | Genes                                                                                                    | P-Value |
|--------------------------------------------------------------|----------------------------------------------------------------------------------------------------------|---------|
| Cell cycle                                                   | E2F1, CDKN1A, CCND1, HDAC1, GADD45G, RB1, YWHAE, CDK2, MAD1L1, YWHAZ, YWHAH, CCND3, GADD45A, CDC25B      | 264E-05 |
| Apoptosis                                                    | CASP3, XIAP, RIPK1, CASP7, BAX, NFKBIA, BCL2L1, BAD,                                                     | 307E-06 |
| Focal adhesion                                               | COL4A2, COL4A1, CCND3, ACTN4, GRB2, FYN, RAC1, THBS2, IGF1R, CDC42, CCND1, VAV3, XIAP, MAPK8, BAD, PARVA | 244E-04 |
| Adherens junction                                            | IGF1R, CDC42, CTNNA1, CSNK2A2, CSNK2A1, ACTN4, FYN, RAC1, CSNK2B, WAS                                    | 754E-06 |
| p53 signaling                                                | CDKN1A, CCND1, CASP3, BAX, GADD45G, DDB2, MDM4, CDK2, CCND3, APAF1, GADD45A                              | 641E-07 |
| TGF-beta signaling                                           | SMURF2, SMAD1, SMURF1, THBS2, SMURF2, SMAD1, SMURF1, THBS2                                               | 129E-03 |
| ErbB signaling                                               | CDKN1A, CBL, MAPK8, BAD, NCK2, GRB2, NCK1                                                                | 144E-03 |
| Insulin signaling                                            | CBL, FBPI, MAPK8, BAD, IRS1                                                                              | 147E-03 |
| Neurotrophin signaling                                       | IGF1R, CCND1, CASP3, BAX, MLH1, MAPK8, BAD, APPL1, YWHAZ, MAP3K5, YWHAH, GRB2, RAC1                      | 247E-06 |
| Wnt signaling                                                | PPP2R1A, CCND1, BTRC, PPP2CA, MAPK8, CTNNBIP1, CSNK2A2, CSNK2A1, CCND3, RAC1, CSNK2B                     | 647E-04 |
| ATM Signaling                                                | CDKN1A, NFKBIA, MAPK8, BRCA1, RAD51                                                                      | 332E-05 |
| Jak-STAT signaling                                           | CCND3, GRB2, STAM, CCND1, CBL, BCL2L1                                                                    | 658E-03 |
| Chemokine signaling                                          | GRB2, RAC1, WAS, CDC42, VAV3, NFKBIB, NFKBIA                                                             | 543E-03 |
| MAPKinase Signaling                                          | MAP3K5, GRB2, RAC1, MAP3K3, RIPK1, NFKBIA, MAPK8                                                         | 492E-03 |
| Apoptotic Signaling in Response to DNA Damage                | CASP3, CASP7, BAX, BCL2L1, BAD, PARP1                                                                    | 523E-06 |
| Induction of apoptosis through DR3 and DR4/5 Death Receptors | CASP3, RIPK1, CASP7, NFKBIA                                                                              | 718E-04 |
| Cytosolic DNA-sensing                                        | RIPK1, NFKBIB, NFKBIA                                                                                    | 202E-03 |
| Telomeres, Telomerase, Cellular Aging, and Immortality       | IGF1R, PPP2CA, RB1                                                                                       | 115E-03 |
| Natural killer cell mediated cytotoxicity                    | GRB2, FYN, RAC1, HLA-A, LCP2                                                                             | 123E-03 |
| CARM1 and Regulation of the Estrogen Receptor                | CCND1, GTF2F1, TBP, BRCA1                                                                                | 455E-04 |

**Figure S1 - The Heatmap of the *RRHGE* gene signature by using the expression values of the genes from the Desmedt dataset, and is drawn by using R statistical package (R Development Core Team., 2008). Here, each row corresponds to the genes and each column corresponds to the samples (sorted from ER+ to ER-). The Expression levels of each gene are normalized across the samples with zero mean and standard deviation equals one, where blue represents high expression levels and yellow represents low expression levels. (A) Shows the genes highly expressed in ER+ samples i.e., by applying our ER+ gene signature (326 genes) on the Desmedt dataset visualizes two groups, one is highly expressed (ER+) and other, vice-versa. (B) Shows the genes highly expressed in ER- samples i.e., by applying our ER- gene signature (145 genes) on the Desmedt dataset visualizes two groups, one is highly expressed (ER-) and other, vice-versa.**

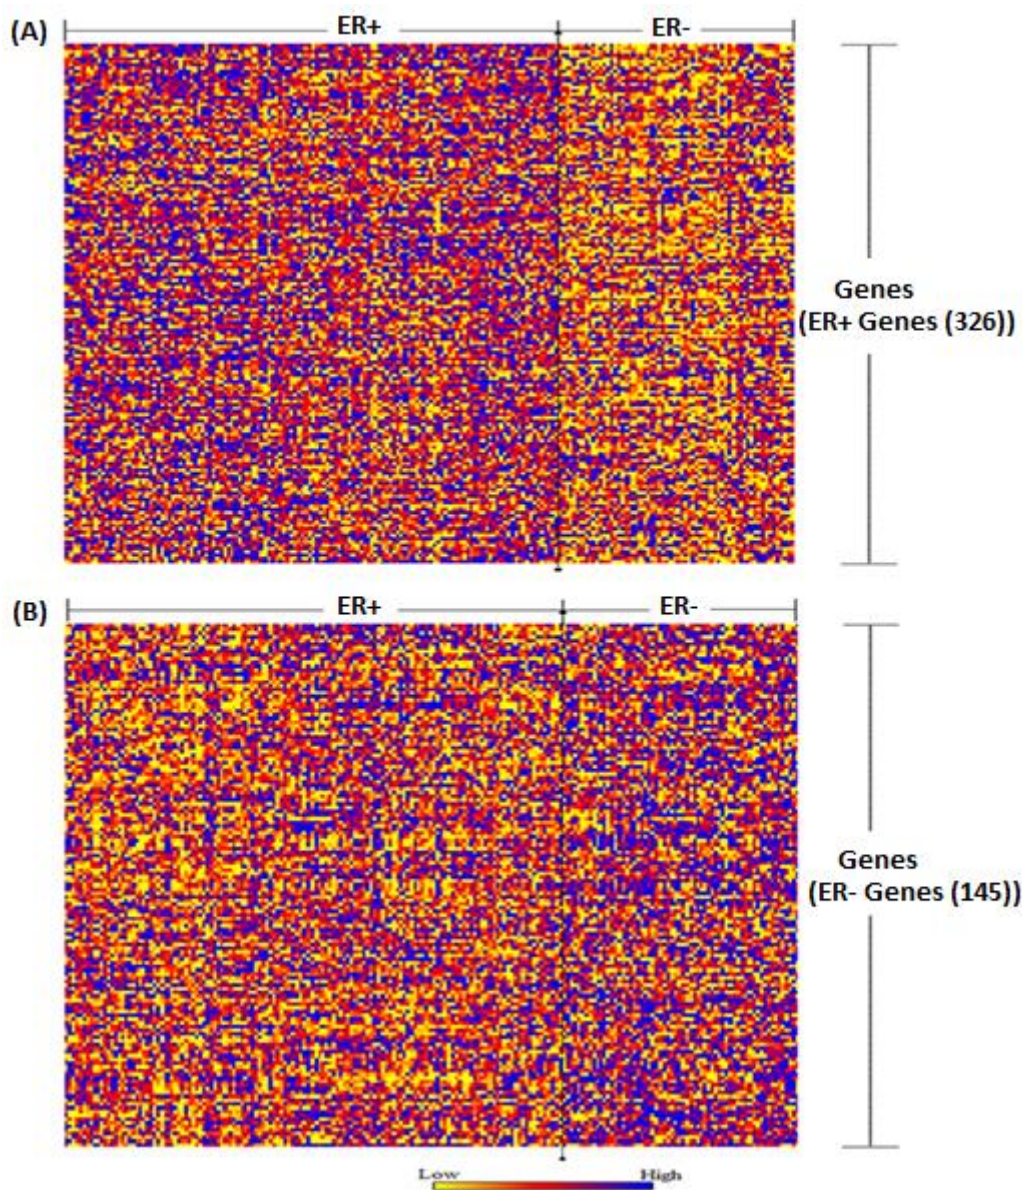

Supplement: f1 [file 362141.f1.pdf]
